# Supplementary material for: NMNAT2 supports vesicular glycolysis via NAD homeostasis to fuel fast axonal transport
Source: PubMed Central journal article supplement (PMC10823734; doi:10.1186/s13024-023-00690-9), 2024-01-29

Fig 1-S1

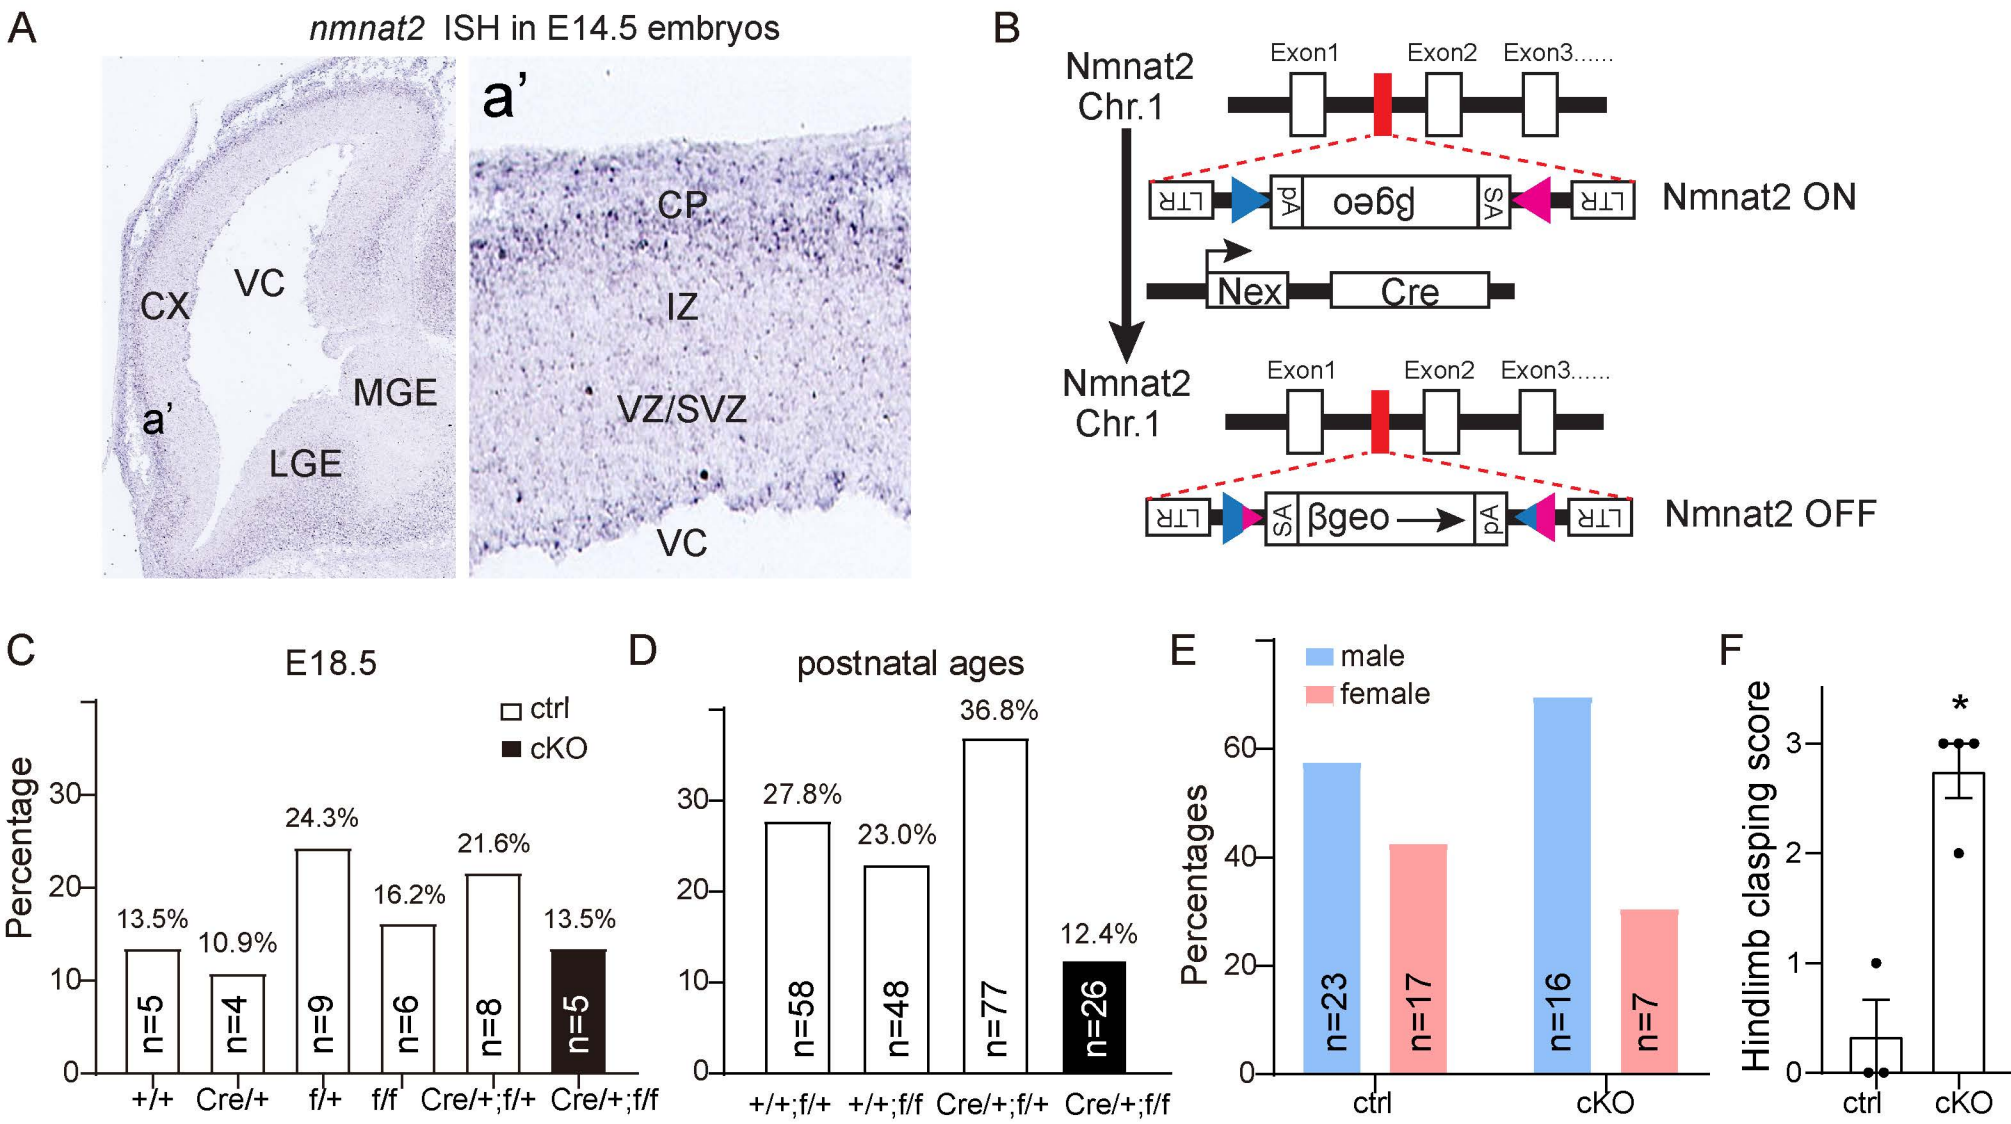

Fig. 2-S1

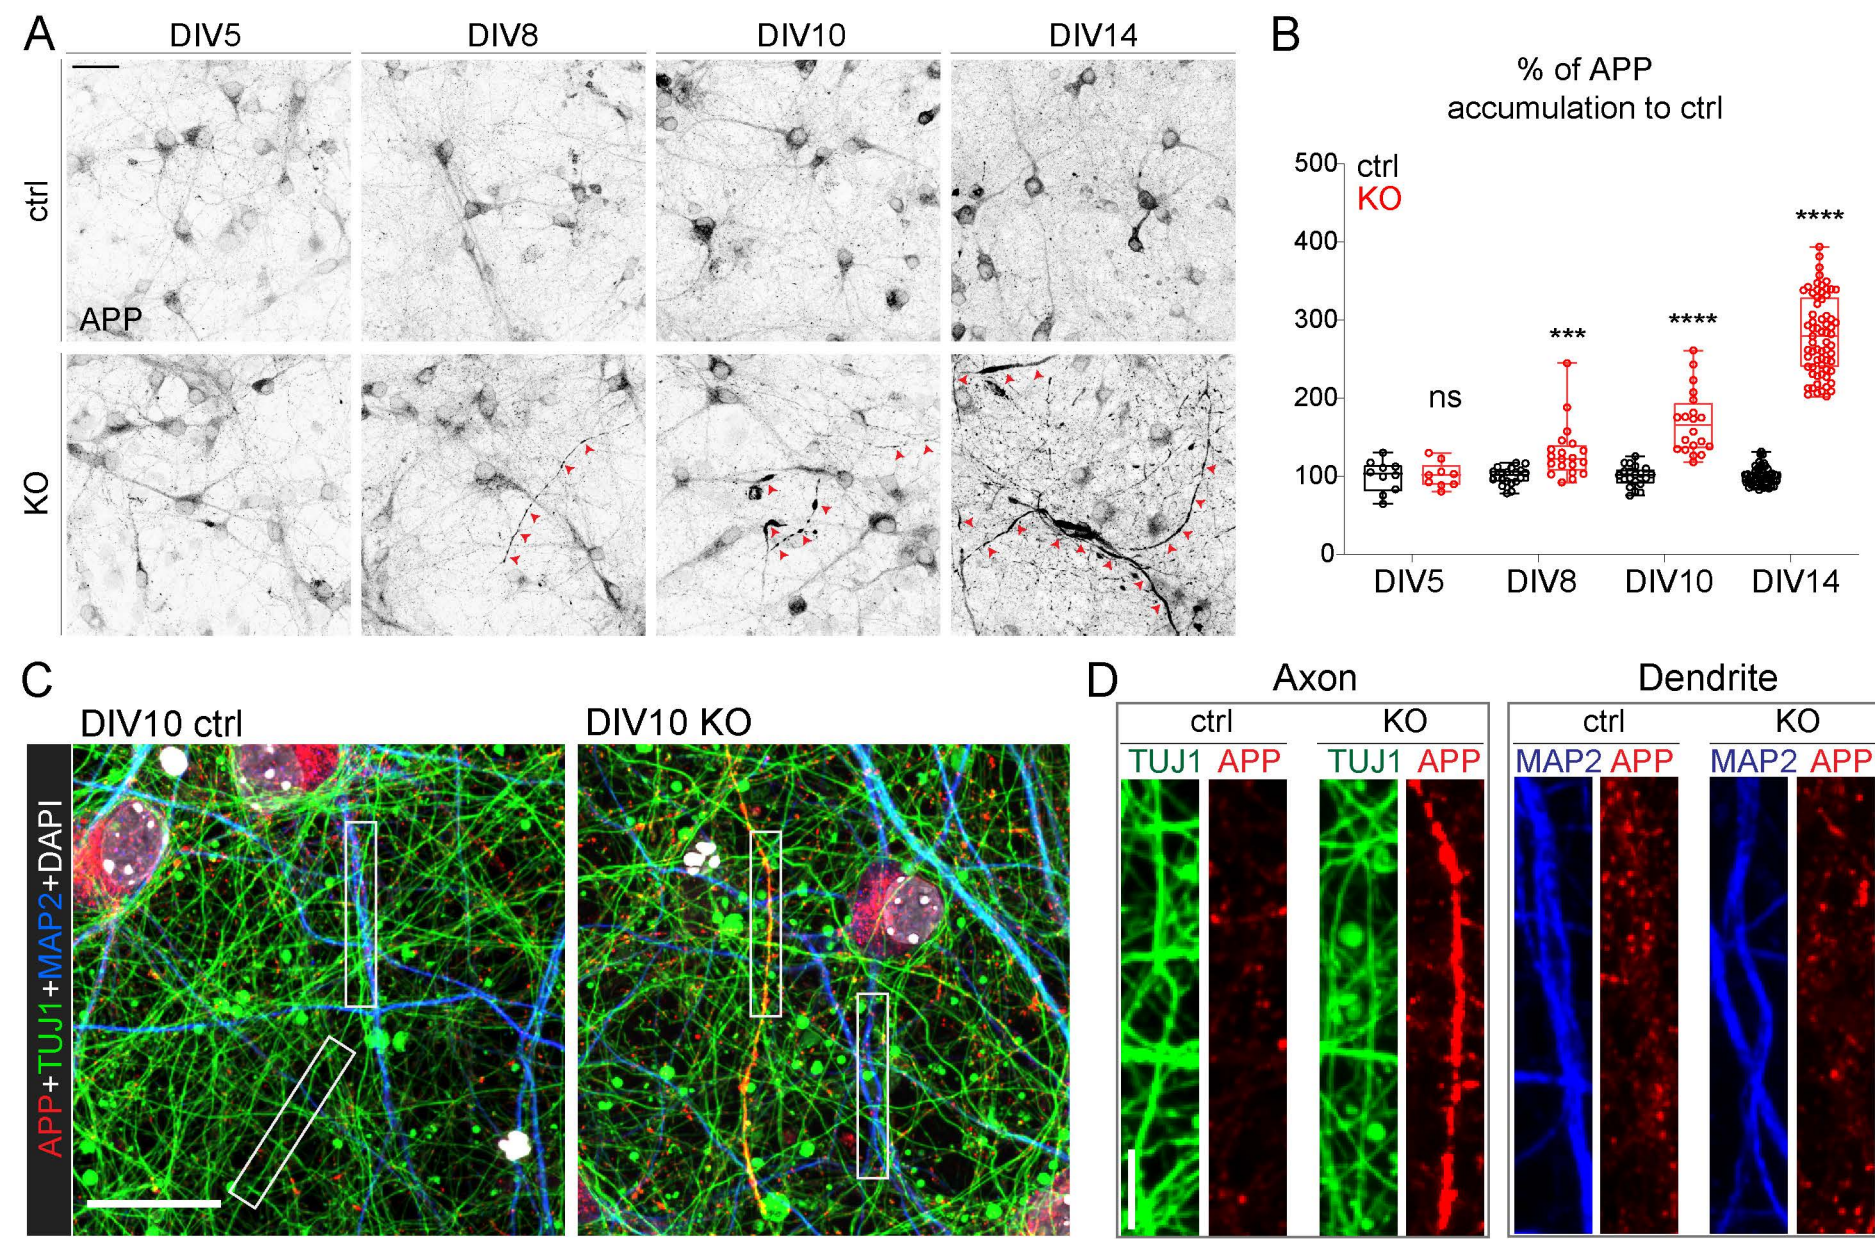



Fig. 2-S2

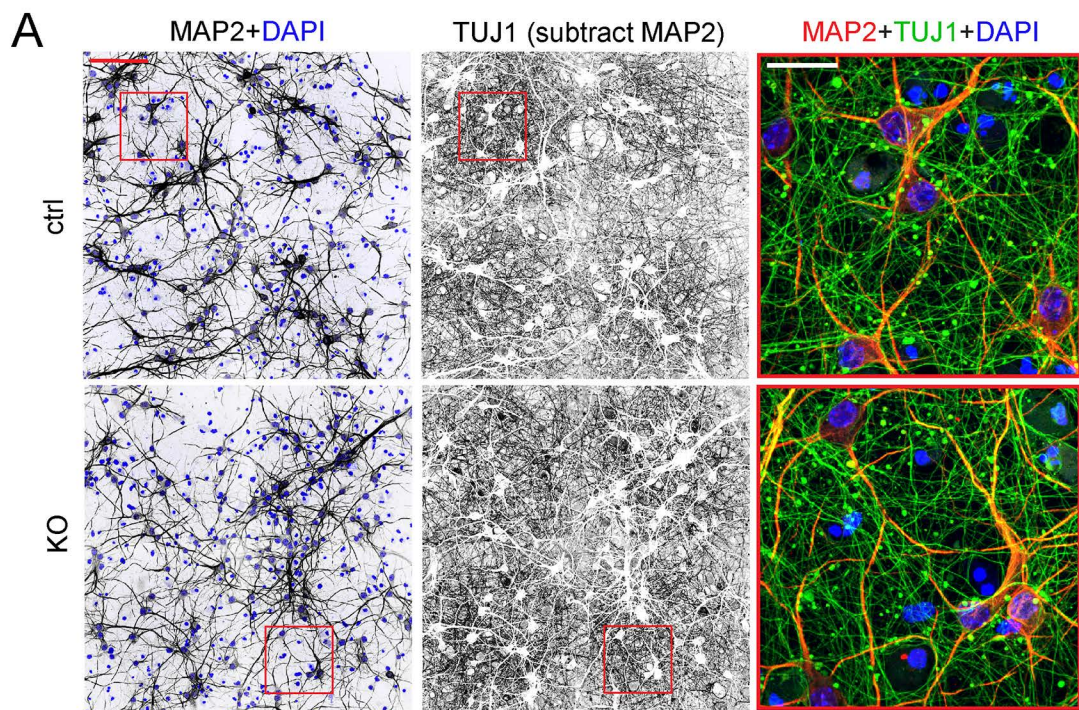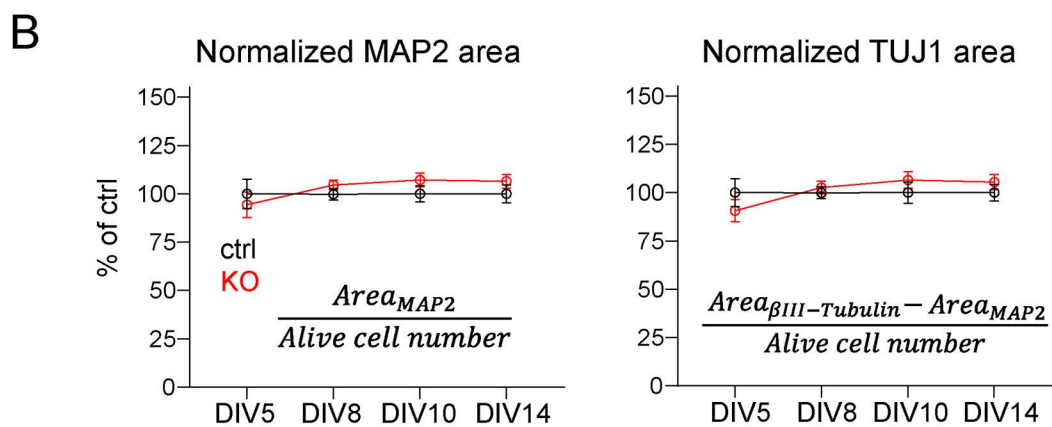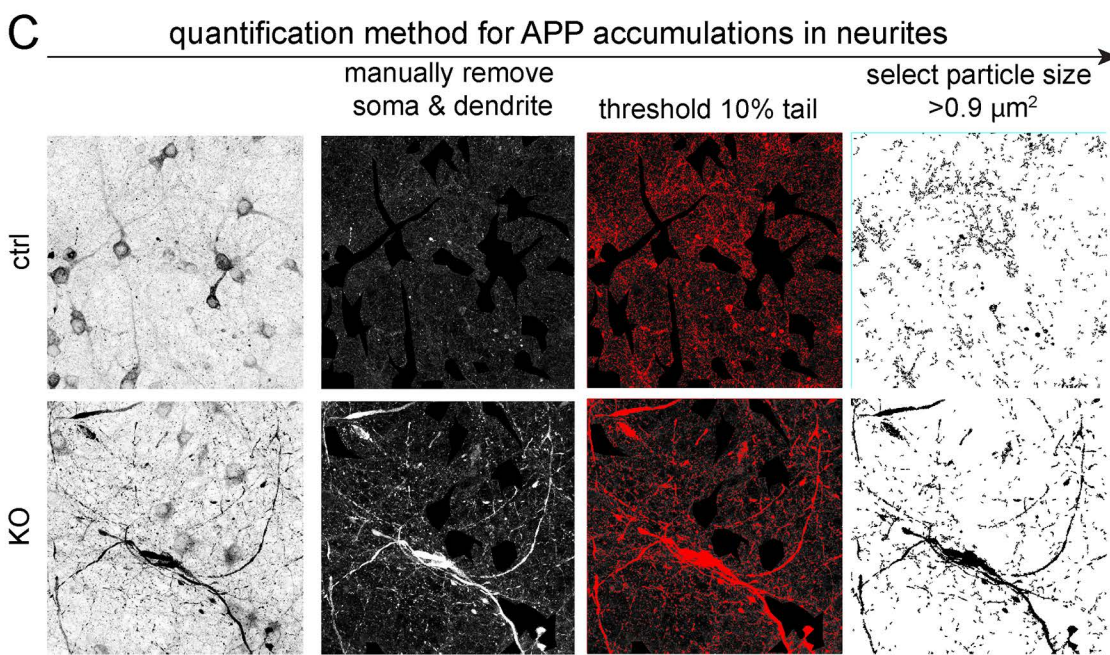



Fig. 2-S3

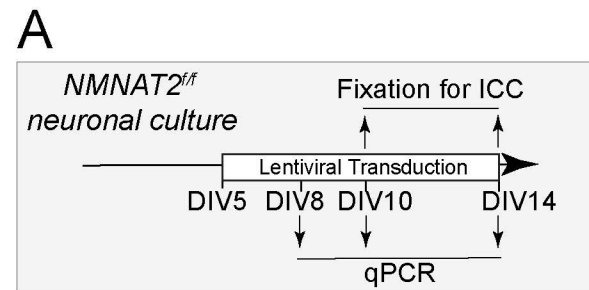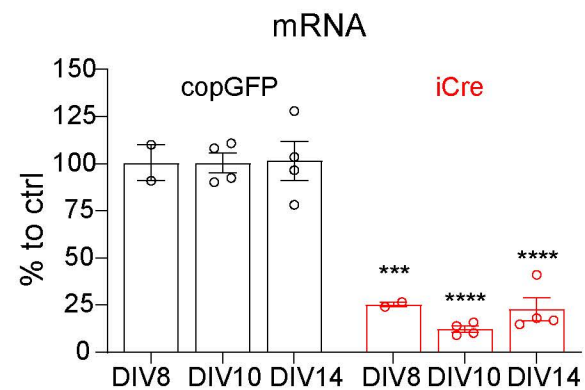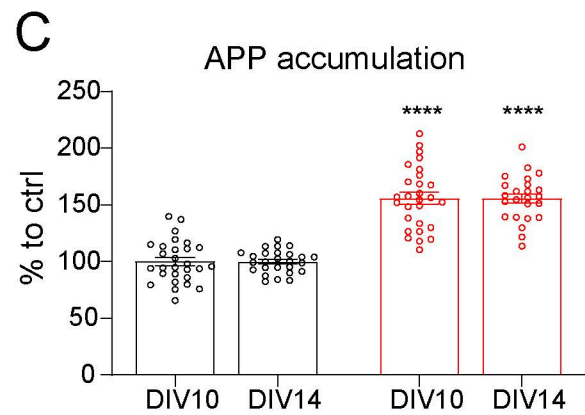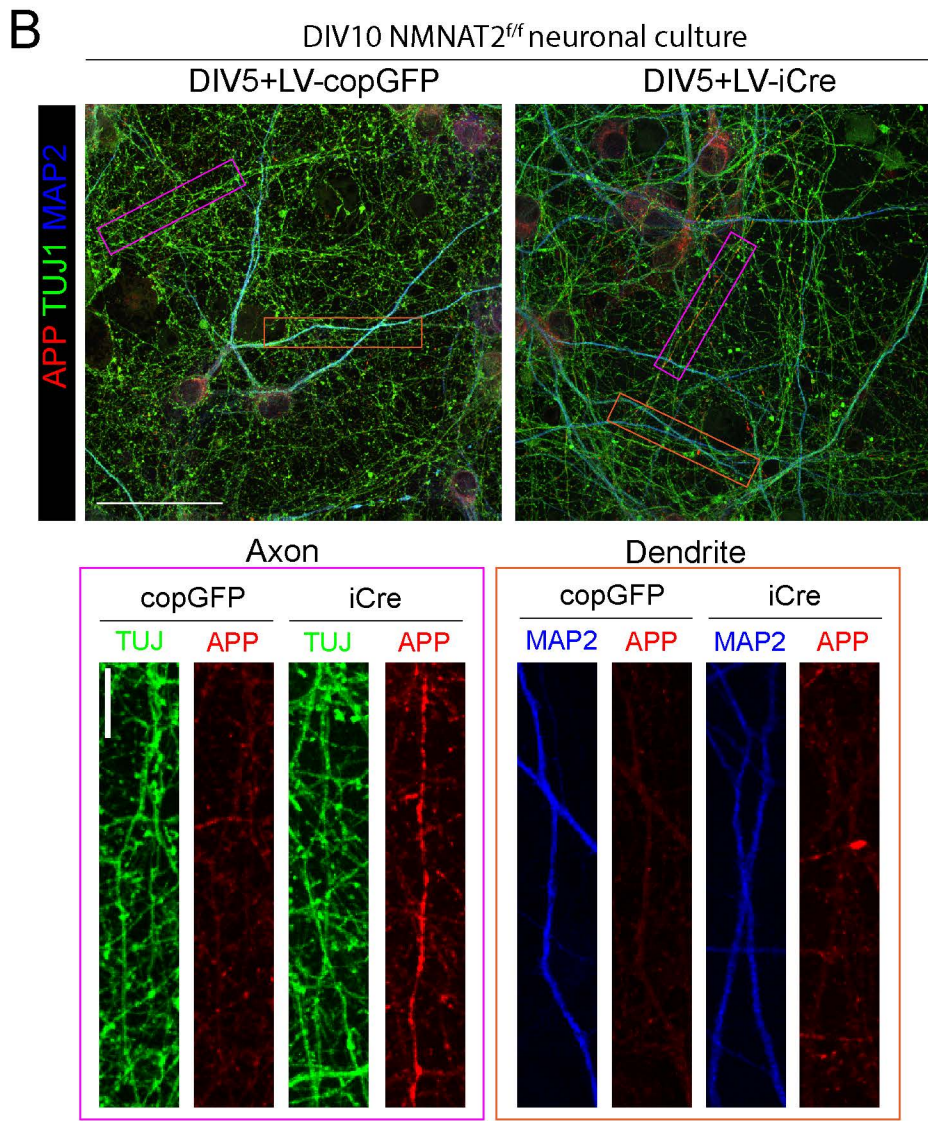

Fig 3-S1

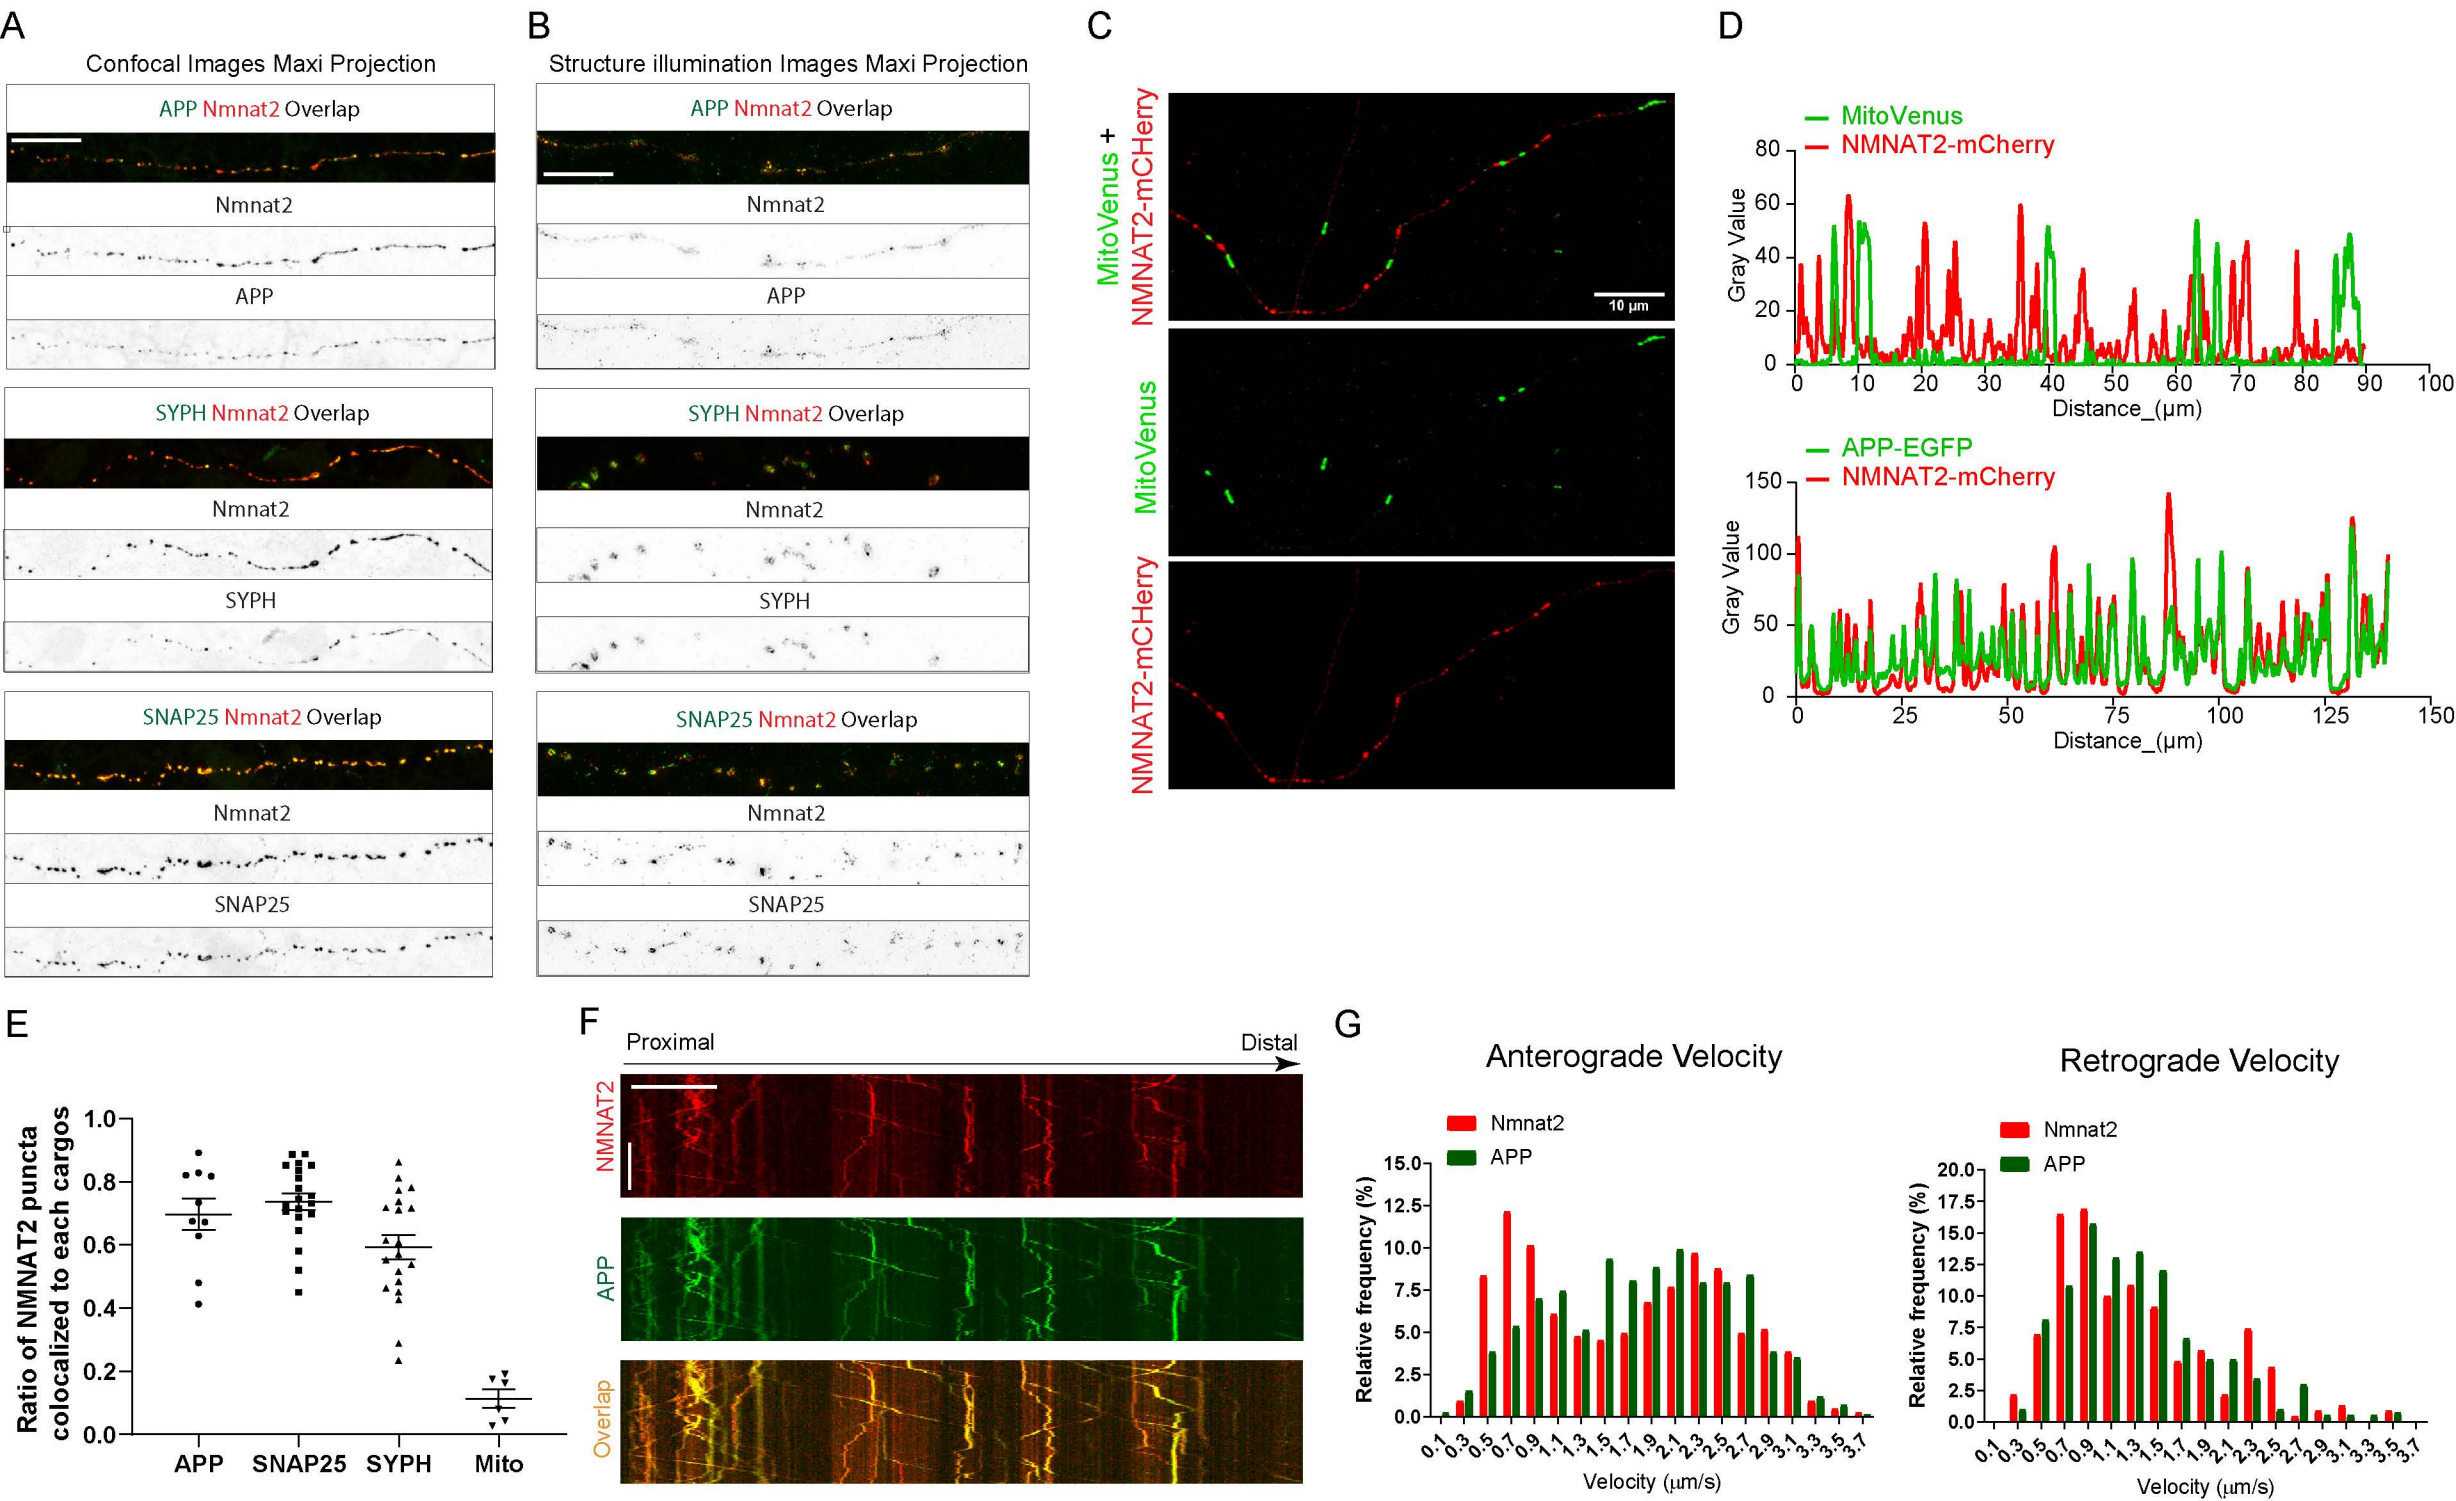

Fig. 3-S2

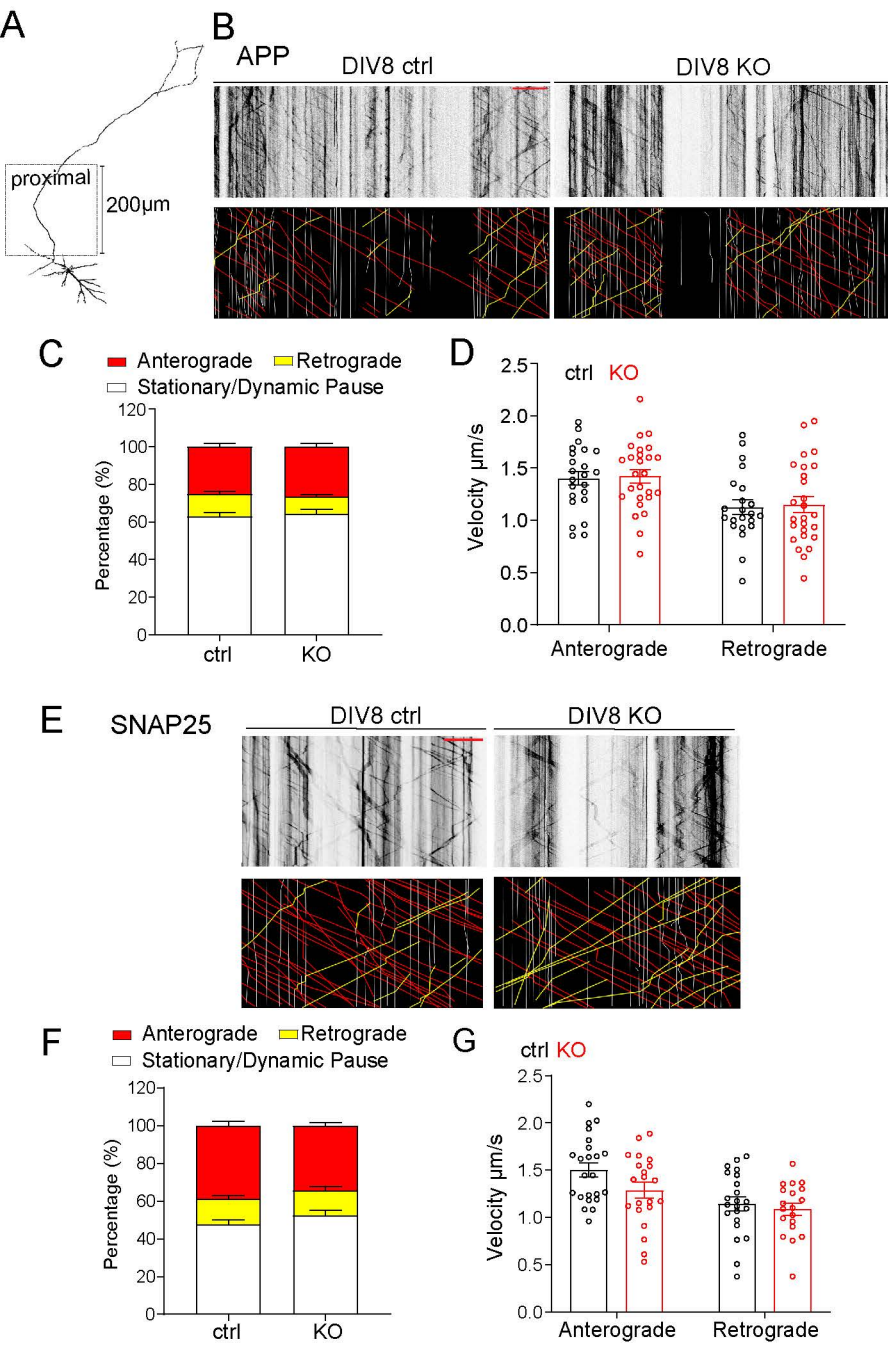



# Fig 3-S3

A1

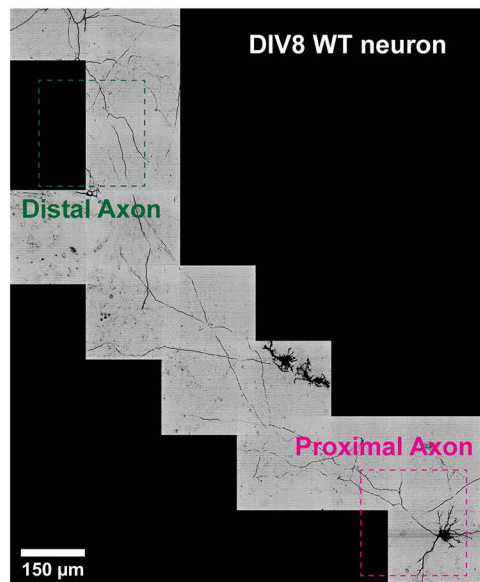

A2

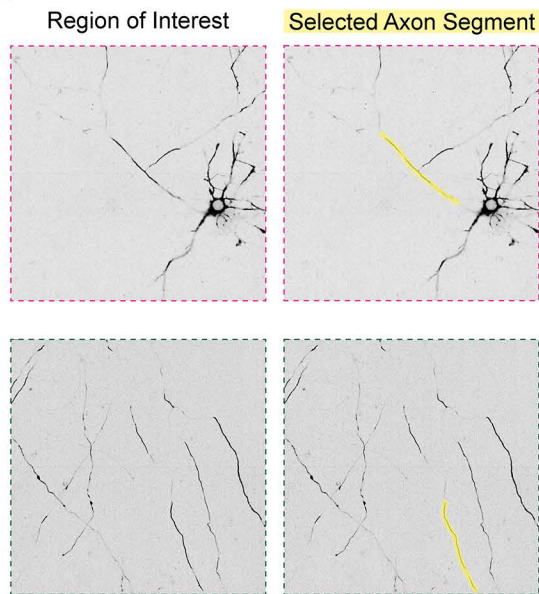

A3

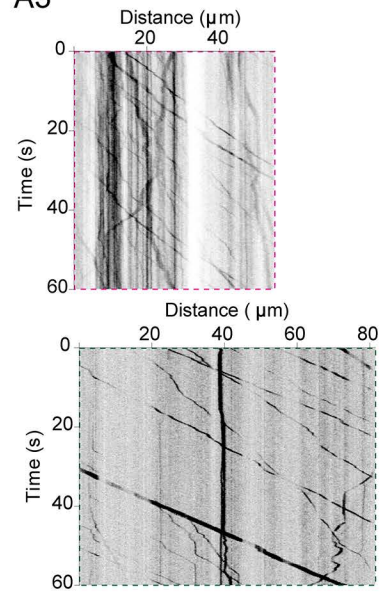

B1

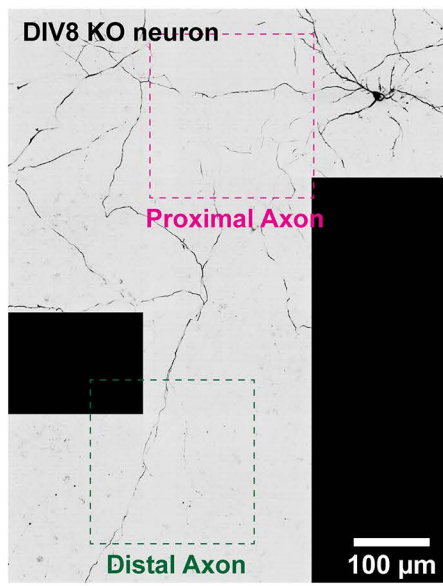

B2

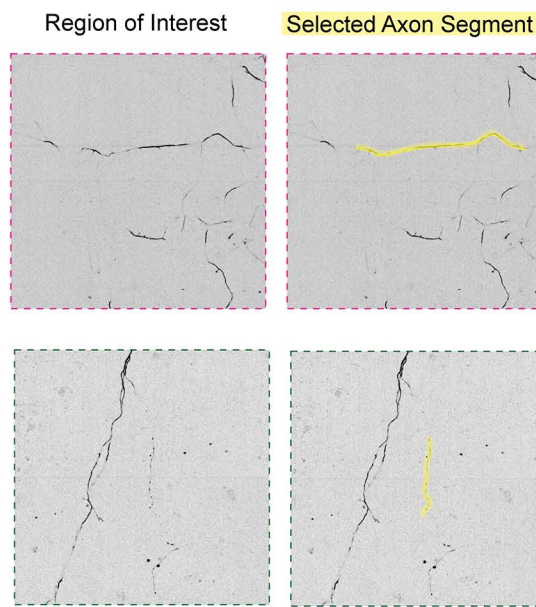

B3

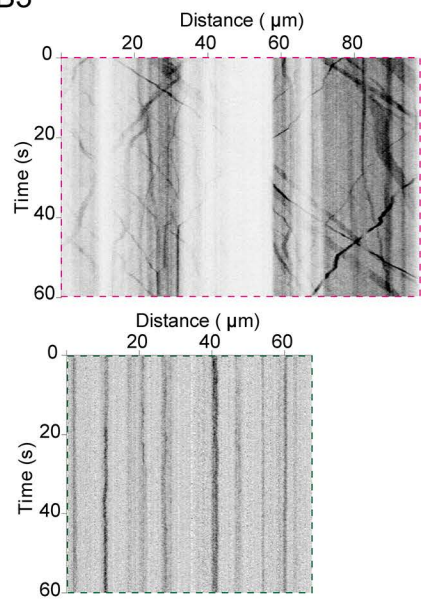

Fig 3-S4

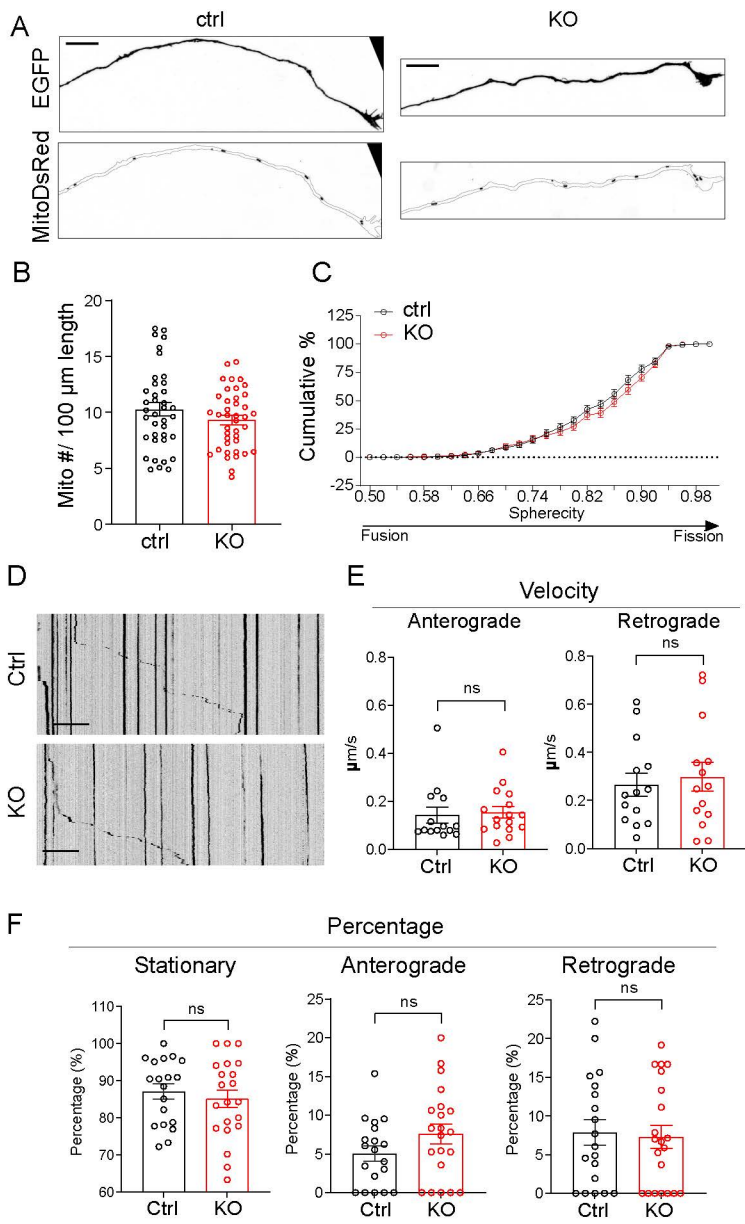



# Fig 5-S1

## A CytopHluorin imaging paradigm

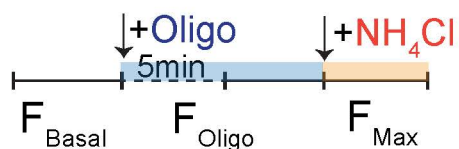

### pH calculation

$$pH_{Basal} = pKa - \log\left[\left(\frac{1 + 10^{pKa-7.4}}{\frac{F_{Basal}}{F_{Max}}}\right) - 1\right]$$

$$pH_{Oligo} = pKa - \log\left[\left(\frac{1 + 10^{pKa-7.4}}{\frac{F_{Oligo}}{F_{Max}}}\right) - 1\right]$$

$pKa = 7.1$  for *CytopHluorin*

## B pH measured by CytopHluorin

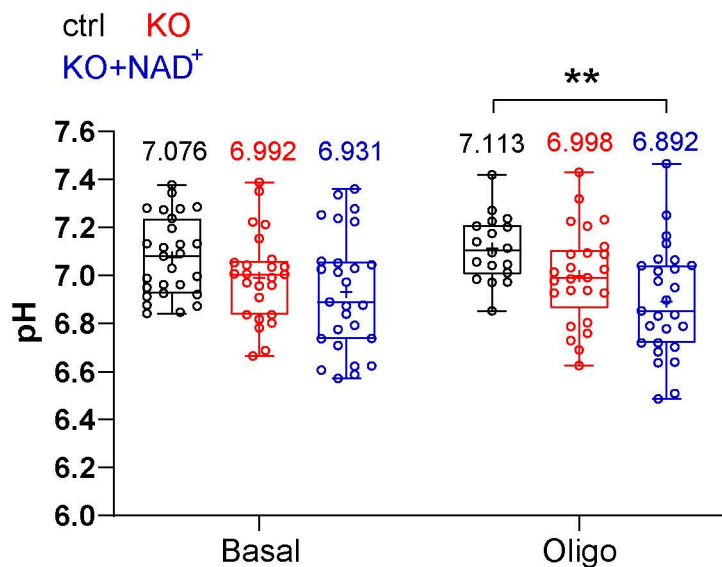

## C

### pH correction of L/F

$L_1 \sim$  Luminescence under  $pH_1$

$L_0 \sim$  Luminescence under  $pH_0$

$$pH_1 = pKa - \log\left[\left(\frac{1 + 10^{pKa-pH_0}}{\frac{L_1}{L_0}}\right) - 1\right]$$

$$L_0 = L_1 * \left(\frac{1 + 10^{pKa-pH_1}}{1 + 10^{pKa-pH_0}}\right)$$

$pKa = 7.03$  for *SynATP*

eg. Convert L in KO+NAD<sup>+</sup> Oligo group (average pH=6.892) to ctrl Oligo condition (average pH=7.113)

$$L_{(pH=7.113)} = L_{(pH=6.892)} * \left(\frac{1 + 10^{7.03-6.892}}{1 + 10^{7.03-7.113}}\right)$$

## D

### Raw SynATP L/F

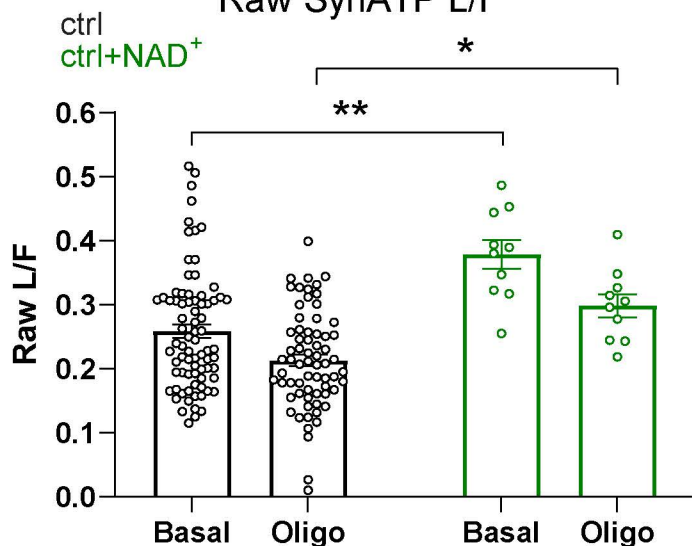

Fig 5-S2

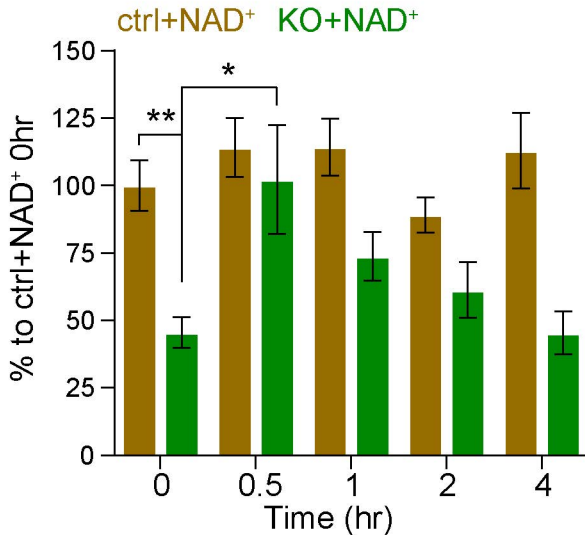



Fig 6-S1

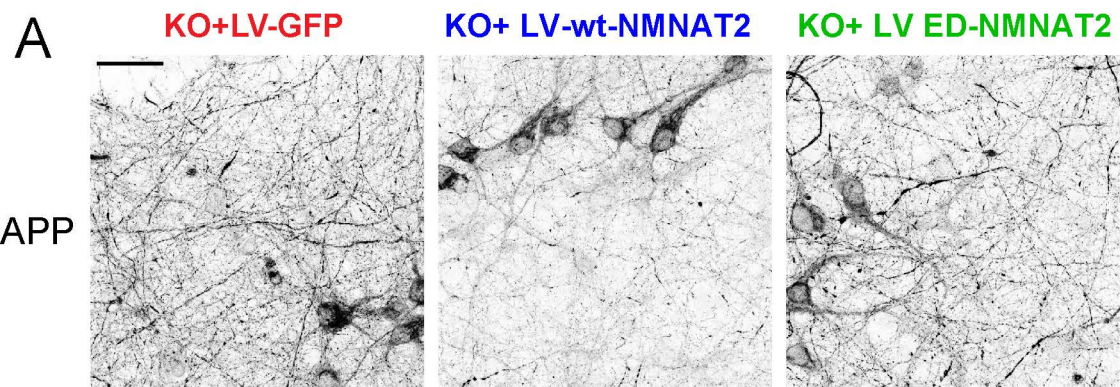

**B**      Lentiviral  
transduction rate

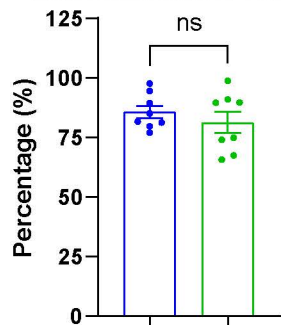

**C**      APP accumulation

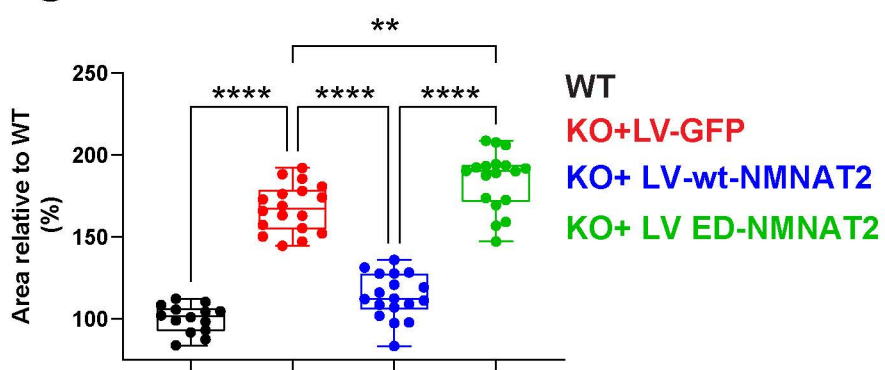

Fig 6-S2

A

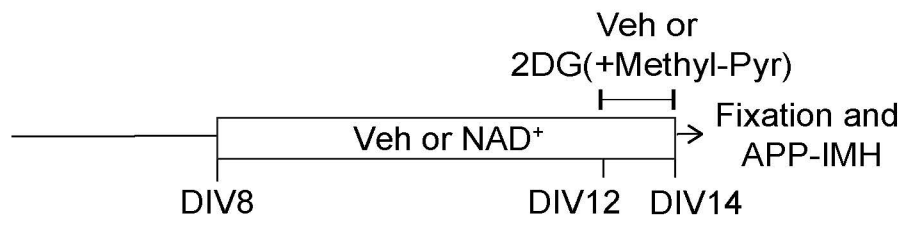

B

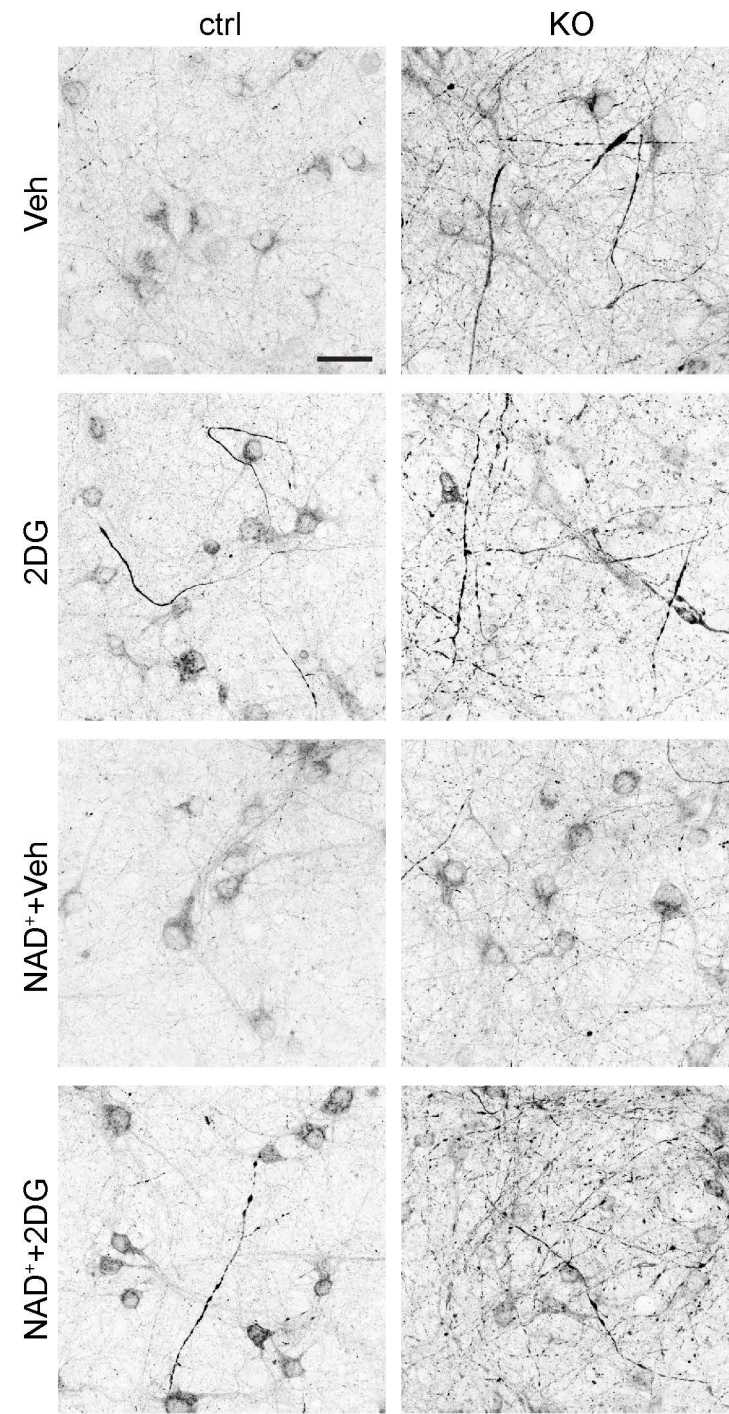

C

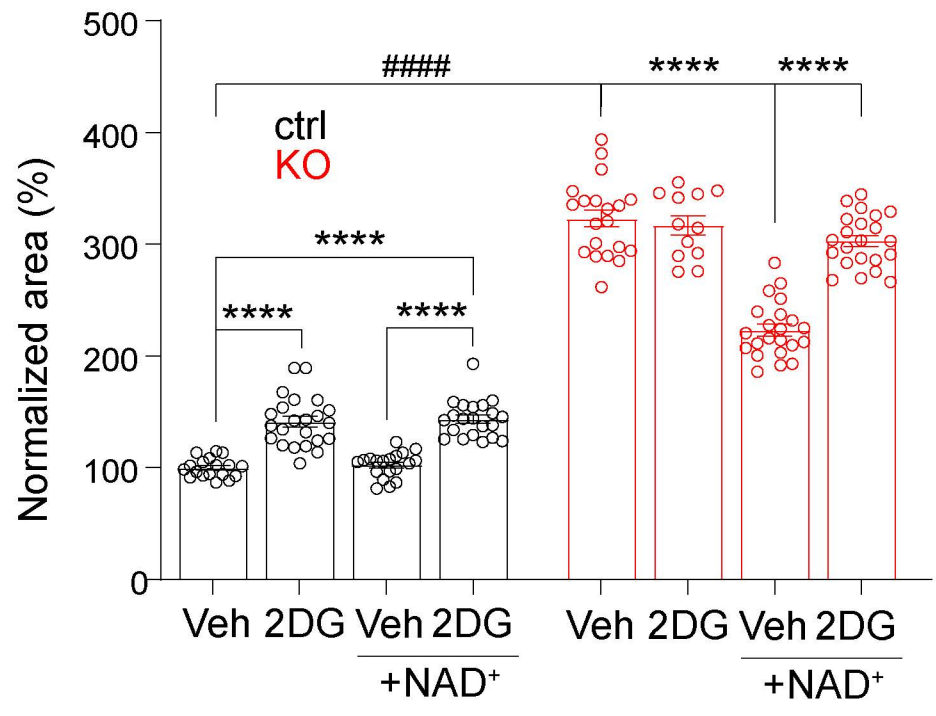



Fig 7-S1

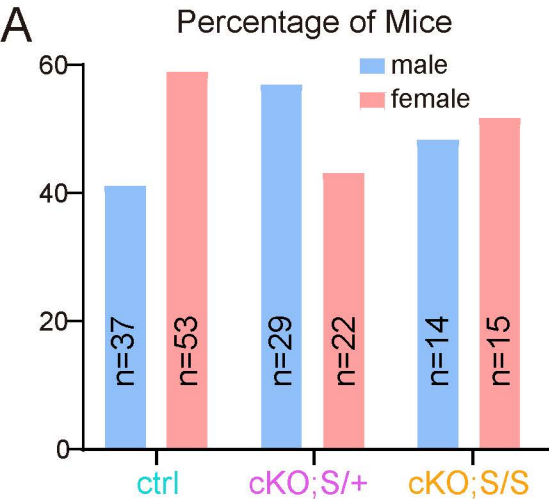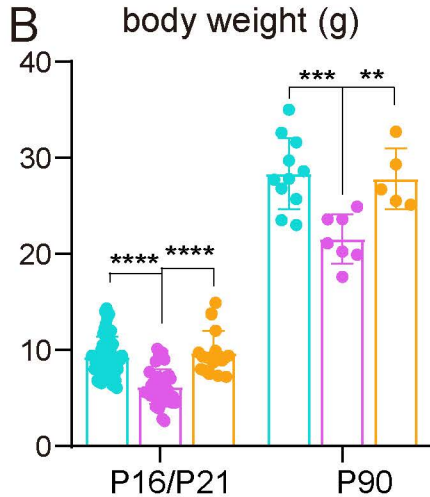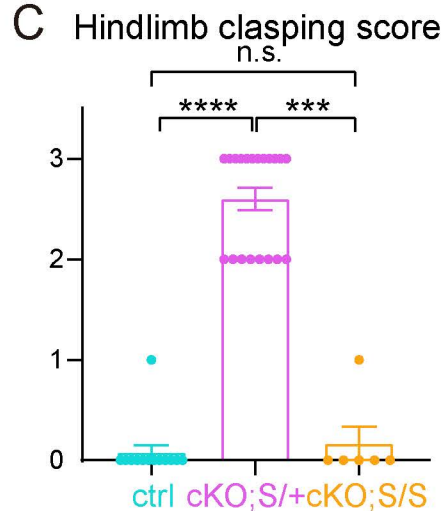

Fig 7-S2

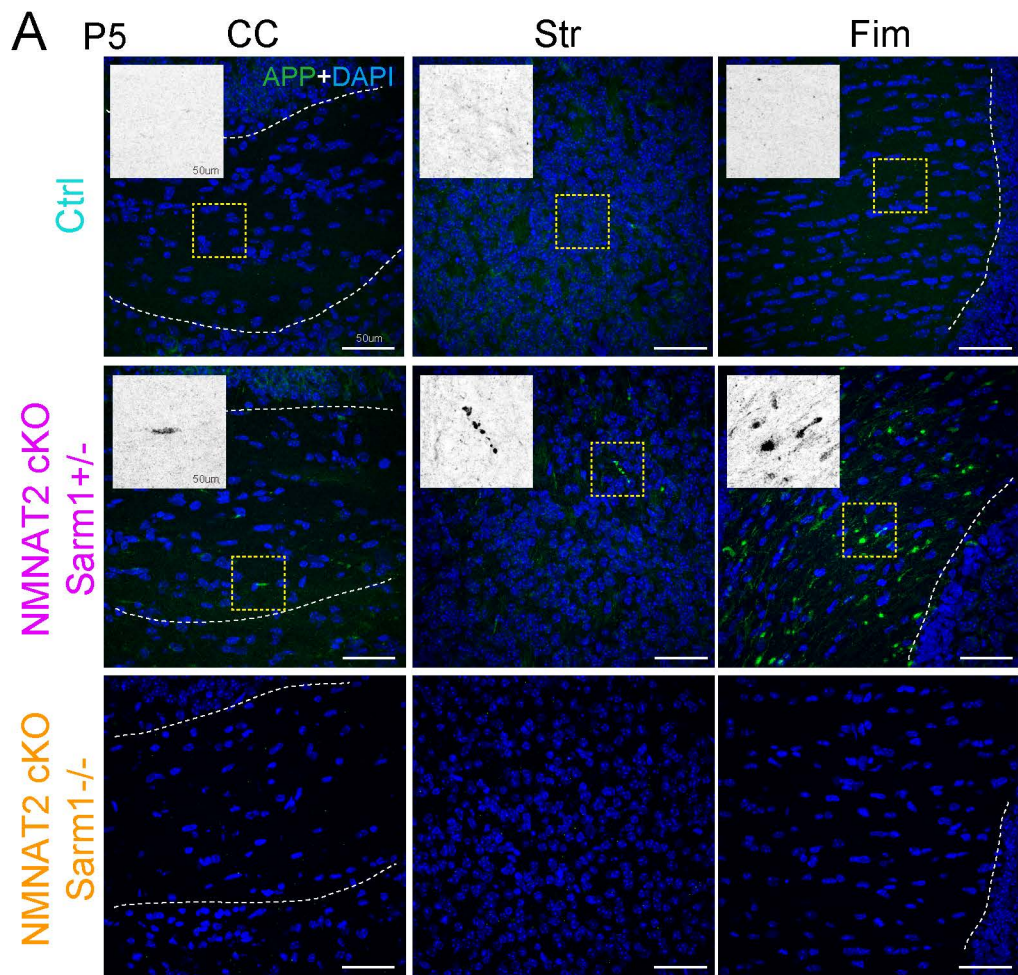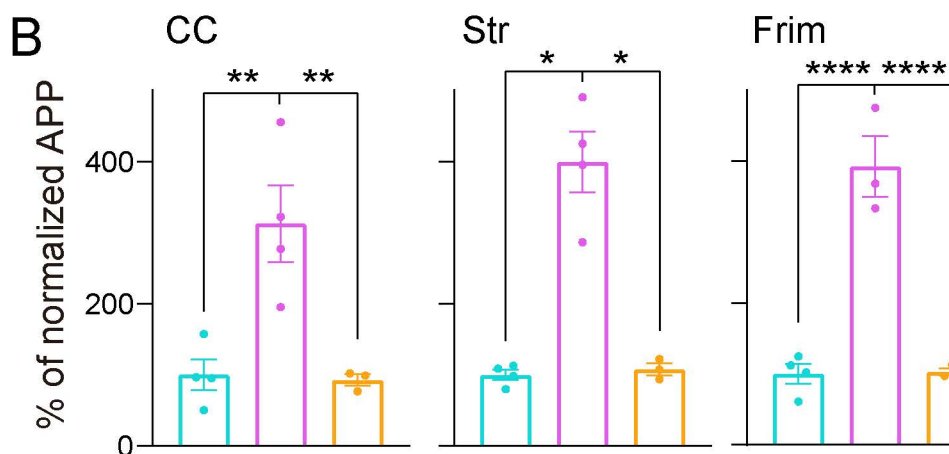



Fig 8-S1

**A** qPCR

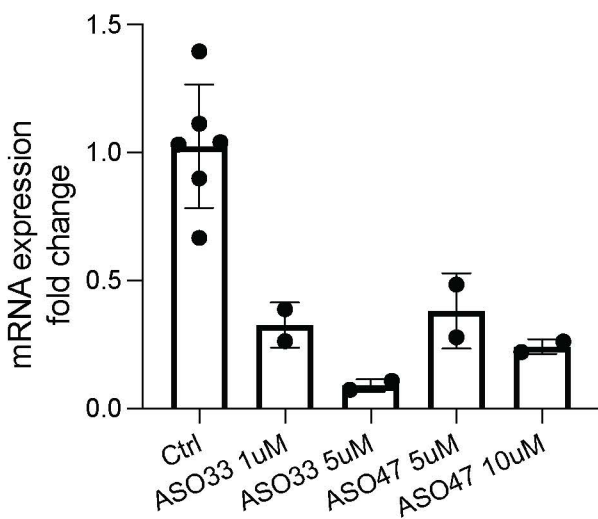

**B** ASO treatment from DIV6 to DIV8

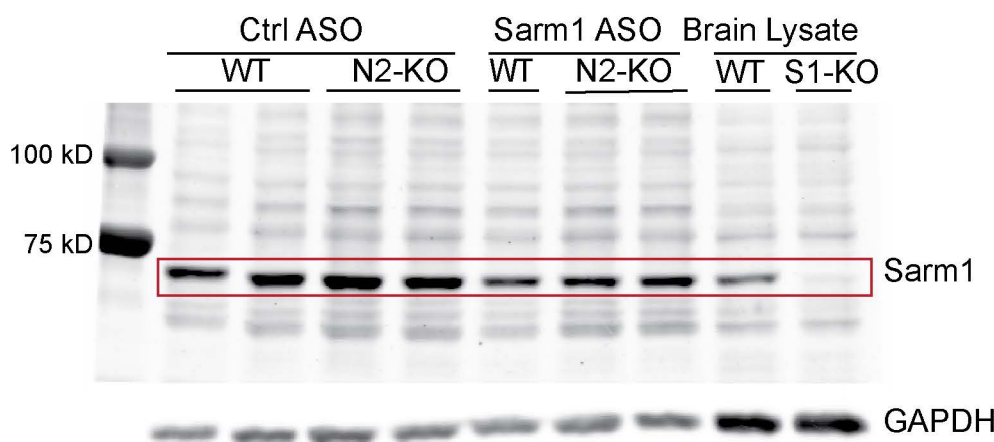

**C**

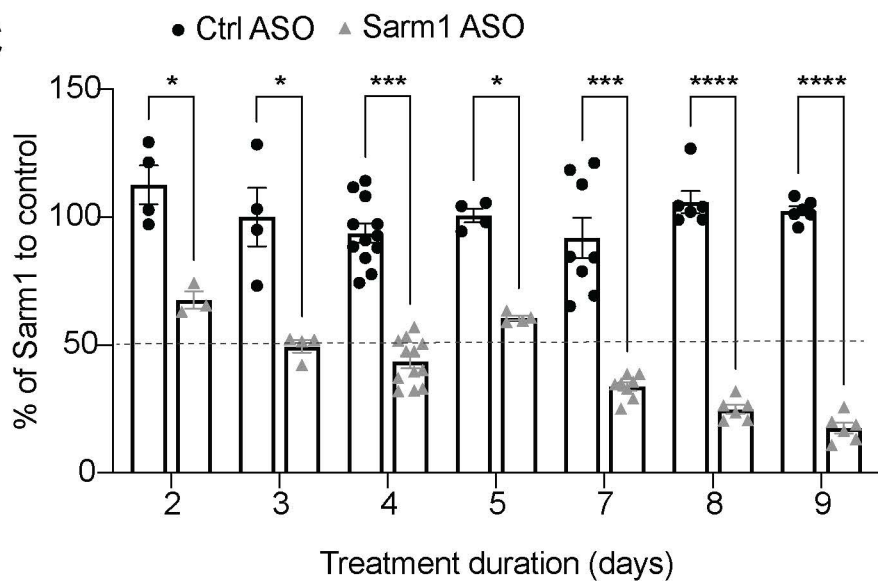

Fig 8-S2

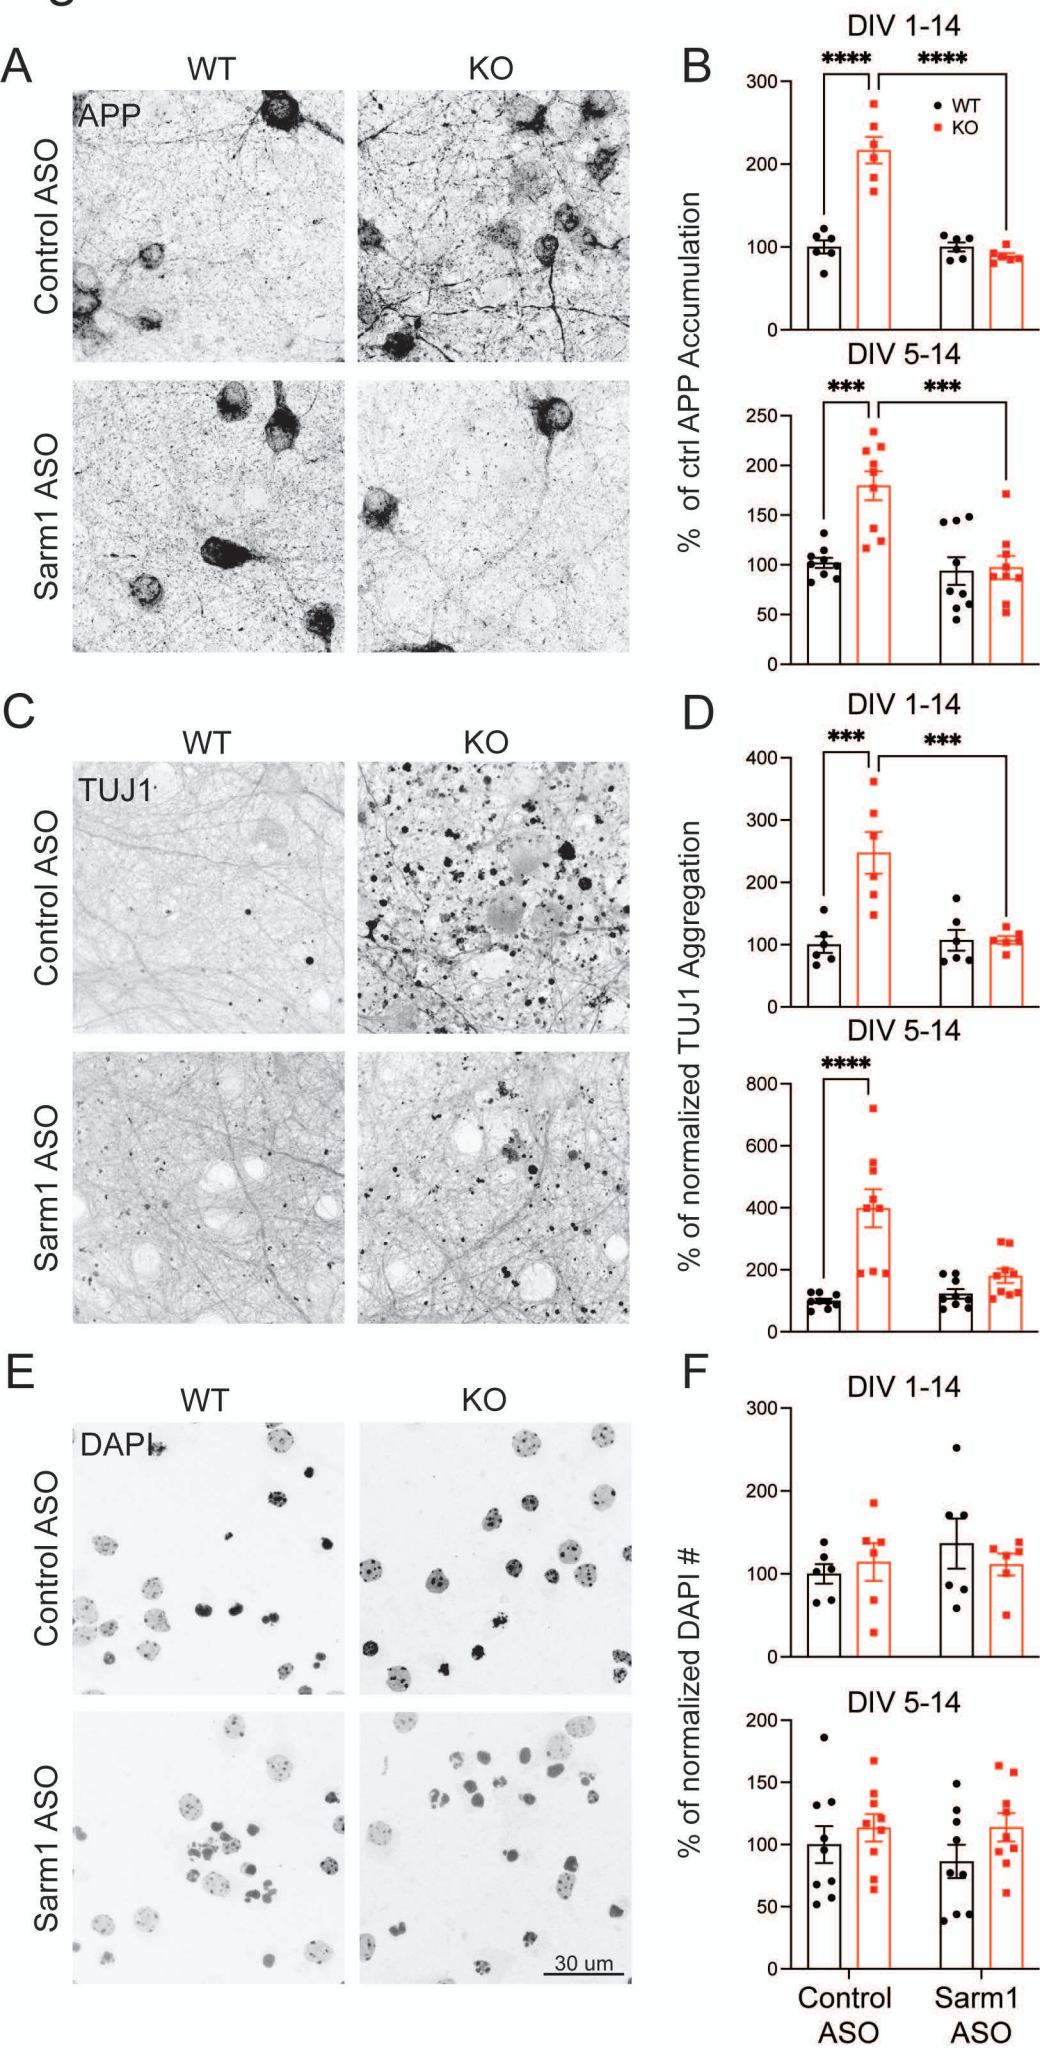



Fig 8-S3

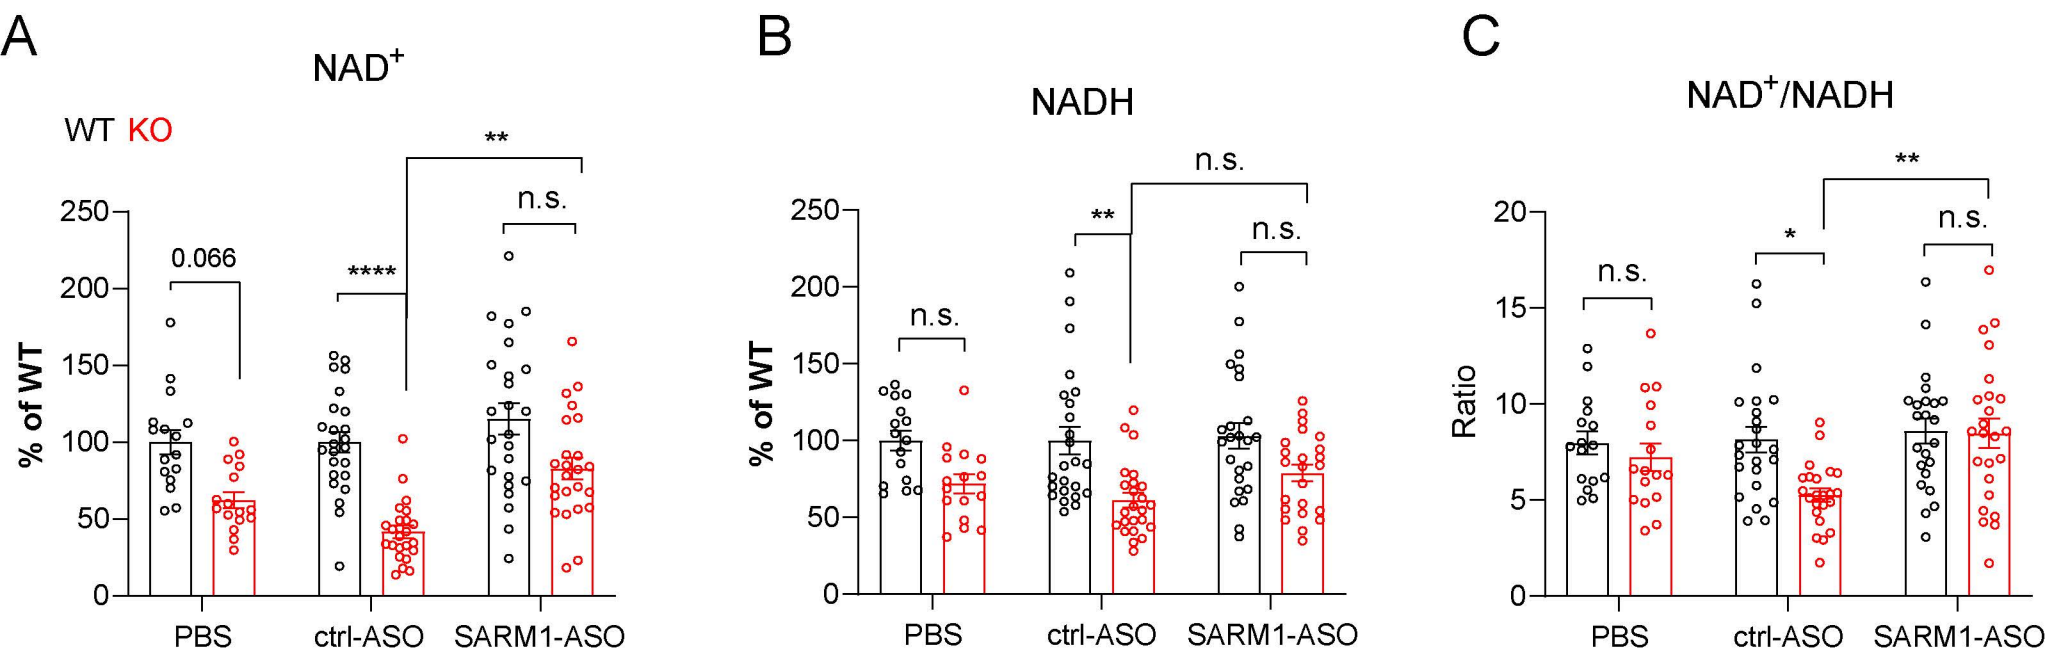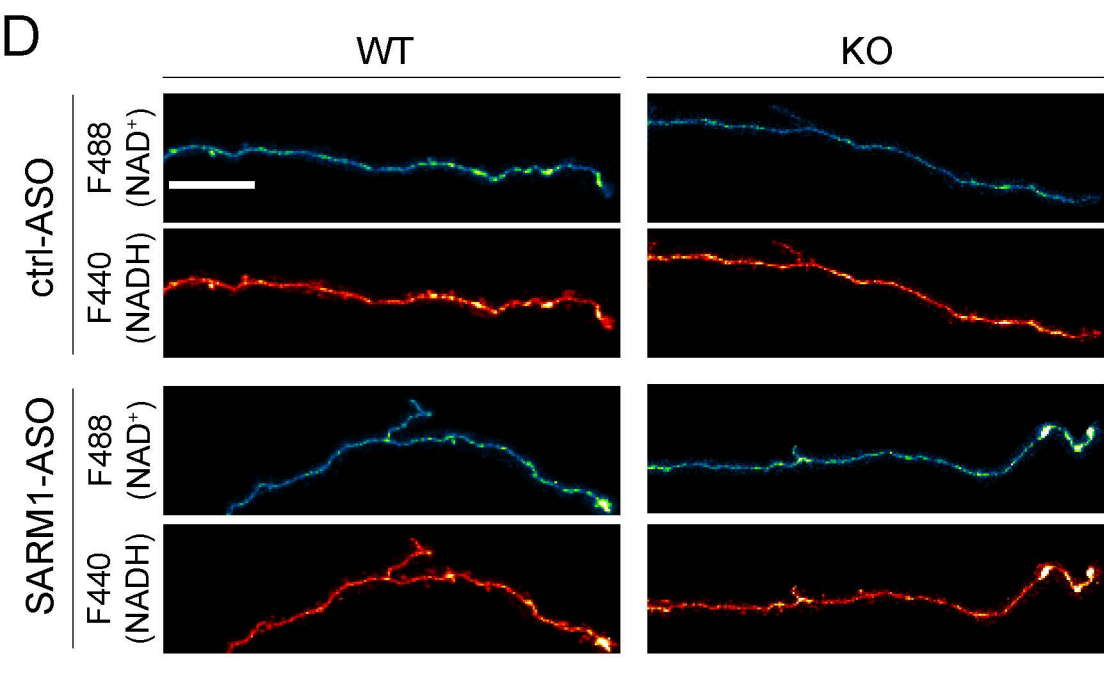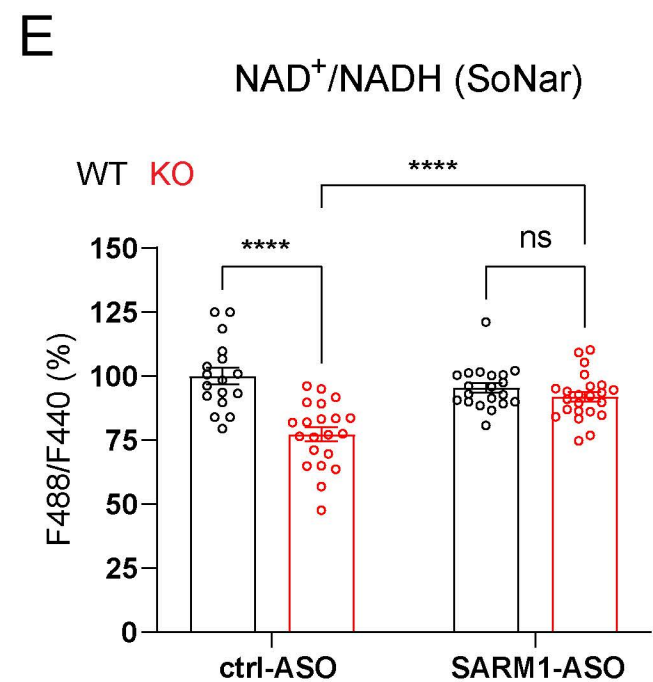

Supplement: 13024_2023_690_MOESM1_ESM.pdf [file 13024_2023_690_MOESM1_ESM.pdf]
